# Supplementary figures and images for: Hospital Antibiotic Consumption before and during the COVID-19 Pandemic in Hungary
Source: MDPI journal article supplement (doi:10.3390/antibiotics13010102), 2024-01-20

Figure S1: Trend analysis of antibiotic utilisation expressed as DDD per 100 patient-days (DHPD)

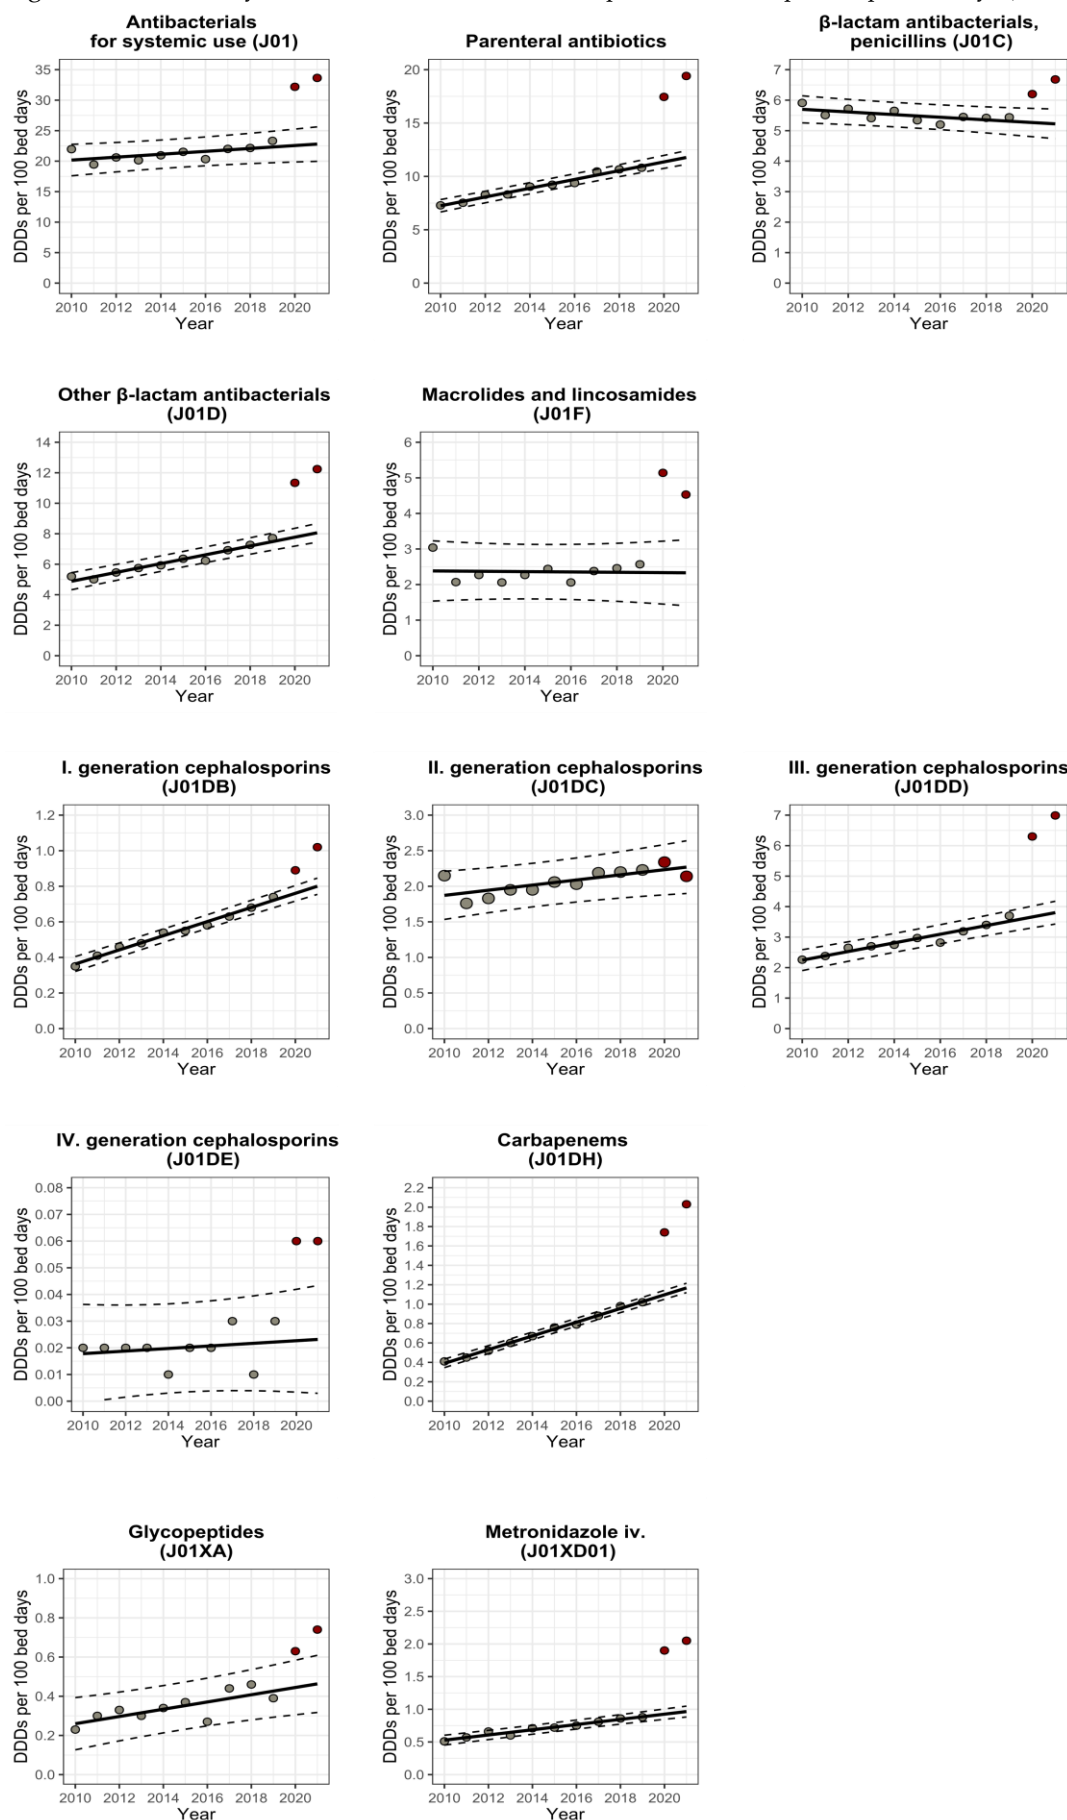

Supplement: s1 [file s1]
